# Supplementary material for: Solution processed n-In2O3nanostructures for organic–inorganic hybrid p–n junctions
Source: Royal Society of Chemistry journal article supplement (doi:10.1039/c4nr03537b), 2014-07-24
Supplement: c4nr03537b1.pdf [file c4nr03537b1.pdf]

**ELECTRONIC SUPPLEMENTARY INFORMATION:**

**Solution processed  $n\text{-In}_2\text{O}_3$  nanostructures for organic-inorganic  
hybrid  $p\text{-}n$  junctions**

**G. Mohan Kumar<sup>a\*</sup>, A. Madhan Kumar<sup>b</sup>, P. Ilanchezhian<sup>a</sup> and T. W. Kang<sup>a\*</sup>**

<sup>a</sup>Quantum-Functional Semiconductor Research Centre, Dongguk University, Seoul, Republic of Korea.

<sup>b</sup>Center of Research Excellence in Corrosion,

King Fahd University of Petroleum & Minerals, Kingdom of Saudi Arabia

Fax: +82-2-2278-4519; Tel: +82-10-4896-1777

Email: selvi1382@gmail.com, twkang@dongguk.edu

**Experiment:**

**Preparation of  $\text{In}_2\text{O}_3$  colloidal dispersion:** 50 mg of the prepared  $\text{In}_2\text{O}_3$  nanoparticles were dispersed in a 20 ml mixture of ethanol and chloroform (1:1). The dispersant was then sonicated for a period of 30 min and aged for 6-12 h. Such treatments were carried out to ensure the separation of larger particulates (as a result of decantation) from the colloidal media. Two-three cycles were carried out to procure a highly dispersed transparent colloidal dispersion. The same was then used for drop casting the interfacial layers.

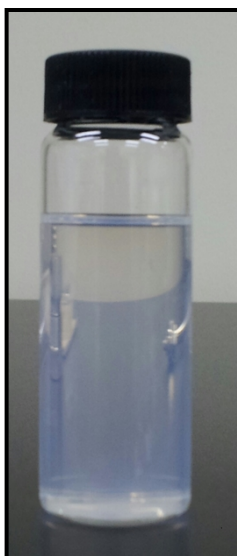

**Figure S1: Highly dispersed/transparent  $\text{In}_2\text{O}_3$  colloidal dispersion.**

**Hydrothermal synthesis of ZnO nanowires:** The ITO substrates were pre-cleaned using ethanol and acetone initially. The seed layers were prepared by immersing the ITO substrates in a solution made of zinc acetate in ethanol, under stirring for a period of 15 min at 65-70° C. The substrates were then dried in a dry stream of nitrogen gas and annealed at 350° C for 30 min. 3-5 cycles were repeated to obtain uniform deposition of ZnO seed layers. The prepared seed layers were then subjected to hydrothermal treatment in a solution made of 25 mM zinc nitrate and hexamethylene tetramine, respectively. The growth conditions for the nanowires involved 120° C/3-9 h. The final products were annealed at 450° C for 30 min.

**Establishing In<sub>2</sub>O<sub>3</sub> buffer layers:** The buffer layers were established on the ZnO NW's via drop casting the colloidal solution used for the fabrication of In<sub>2</sub>O<sub>3</sub> working electrodes. The electrodes were heat treated at 90° C in between each cycles (two-three) for a period of 10 min each and finally annealed at 450° C for 30 min.
